# Supplementary material
Source: HighWire-hosted journal article supplement (https://cmaj.ca/highwire/filestream/150811/field_highwire_adjunct_files/0/231485-res-1-at.pdf)
Supplement: 231485-res-1-at.pdf [file 231485-res-1-at.pdf]

## Appendix 1. The timeline and process of PMPRB regulatory amendments

The following Figures indicate the major milestones in the PMPRB regulatory amendment process. Specifically, the modernization of PMPRB guidelines was first identified as a strategic objective in PMPRB's Strategic Plan 2015-2018.<sup>1,2</sup> PMPRB released their guidelines modernization discussion paper in June 2016<sup>3</sup> and initiated the stakeholder consultation until October 31, 2016,<sup>4</sup> followed by the broad consultation conducted by Health Canada on the proposed amendments from May 16, 2017 to June 28, 2017<sup>5</sup> and the formal publication of the proposed amendments in the Canada Gazette on December 2, 2017.<sup>6</sup> A series of consultations were further conducted including the deliberations of a multi-stakeholder Steering Committee on Modernization of Price Review Process Guidelines who met and provided feedback from June 2018 to May 2019 and the associated recommendations of a Working Group who met and provided feedback from July 2018 to March 2019.<sup>7-9</sup> New regulatory amendments were approved by the Federal Minister of Health and published in the Canada Gazette on August 21, 2019 with a coming-into-force date of July 1, 2020.<sup>10</sup> The corresponding draft guidelines were then published on November 21, 2019,<sup>11</sup> revised on June 19, 2020,<sup>12</sup> and updated on October 23, 2020.<sup>13</sup> Intensive and far reaching public consultations on the draft guidelines occurred during this period.<sup>12</sup> Further consultation on the definition of Gap medicines and the timeline for compliance in the guidelines was conducted from January 15 to February 15, 2021 and final decision was made on April 16, 2021.<sup>14</sup>

However, the coming-into-force date of the amended regulations and guidelines has been delayed four times by 6 months to July 1, 2022 due to the COVID-19 pandemic, feedback from consultations, and successful challenges on the net of all price adjustments disclosure requirement in the Federal Court by an association representing Canada's brand name pharmaceutical industry, Innovative Medicines Canada.<sup>1,15-18</sup> On April 14, 2022, the Federal Minister of Health decided to proceed only with the amendments related to changing new basket of comparator countries but not those related to the requirements to file information net of all price adjustments and to new price regulatory factors.<sup>18,19</sup> The PMPRB then released its updated guidelines accordingly on October 6, 2022 and launched a 60-day consultation period until December 5, 2022.<sup>20</sup> The updated guidelines has not been finalized or implemented. During the interim period between the coming-into-force of the new patented medicines regulations and the final publication of the corresponding guidelines, the Interim Guidance issued by PMPRB on August 18, 2022 will remain in place.<sup>19,20</sup>

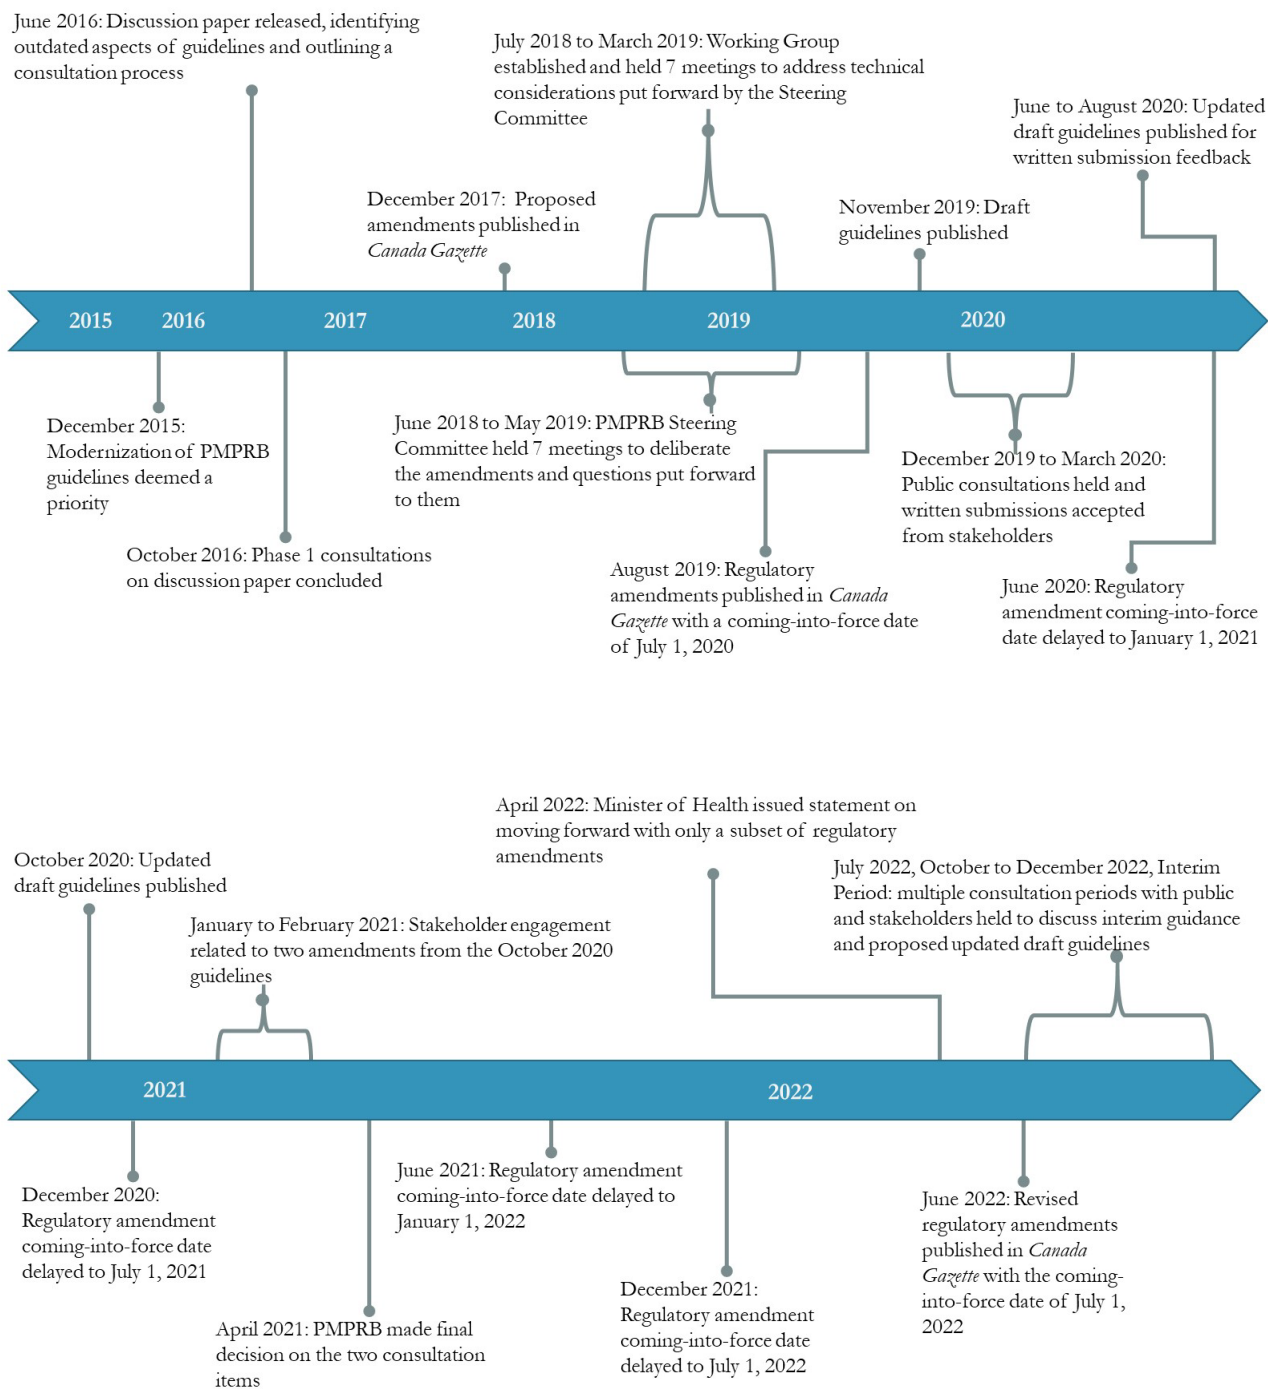

## References

1. Patented Medicine Prices Review Board. PMPRB NEWSletter: October 2020, Volume 24, Issue 1. Published October 23, 2020. Accessed October 5, 2022. <https://www.canada.ca/en/patented-medicine-prices-review/services/pmprb-newsletter/october-2020-volume-24-issue-1.html>

2. Patented Medicine Prices Review Board. *Strategic Plan 2015-2018*. Patented Medicine Prices Review Board; 2015.
3. Patented Medicine Prices Review Board. PMPRB Guidelines Modernization – Discussion Paper – June 2016. Published June 15, 2016. Accessed February 1, 2023. <http://www.pmprb-cepmb.gc.ca/en/news-and-events/consultations/current-major-consultations/rethinking-the-guidelines/discussion-paper>
4. Patented Medicine Prices Review Board. Rethinking the Guidelines. Published June 24, 2016. Accessed August 25, 2023. <http://www.pmprb-cepmb.gc.ca/en/news-and-events/consultations/current-major-consultations/rethinking-the-guidelines>
5. Health Canada. Protecting Canadians from Excessive Drug Prices: Consulting on Proposed Amendments to the Patented Medicines Regulations. Published May 16, 2017. Accessed October 5, 2022. <https://www.canada.ca/en/health-canada/programs/consultation-regulations-patented-medicine/document.html>
6. Government of Canada. Regulations Amending the Patented Medicines Regulations. *Canada Gazette Part I*. 2017;151(48). Accessed October 5, 2022. <https://gazette.gc.ca/rp-pr/p1/2017/2017-12-02/html/reg2-eng.html>
7. Patented Medicine Prices Review Board. Steering Committee on Modernization of Price Review Process Guidelines. Published June 28, 2018. Accessed October 5, 2022. <http://www.pmprb-cepmb.gc.ca/view.asp?ccid=1378&lang=en>
8. Patented Medicine Prices Review Board. PMPRB Steering Committee on Modernization of Price Review Process Guidelines - Final Report. Published July 2, 2019. Accessed October 5, 2022. <http://www.pmprb-cepmb.gc.ca/view.asp?ccid=1463&lang=en>
9. Patented Medicine Prices Review Board. Working Group to Inform the Patented Medicine Prices Review Board (PMPRB) Steering Committee on Modernization of Price Review Process Guidelines - Final Report. Published March 2019. Accessed October 5, 2022. <http://www.pmprb-cepmb.gc.ca/view.asp?ccid=1449>
10. Government of Canada. Regulations Amending the Patented Medicines Regulations (Additional Factors and Information Reporting Requirements): SOR/2019-298. *Canada Gazette Part II*. 2019;153(17). Accessed October 10, 2020. <http://www.gazette.gc.ca/rp-pr/p2/2019/2019-08-21/html/sor-dors298-eng.html>
11. Patented Medicine Prices Review Board. PMPRB Guidelines 2019. Published June 19, 2020. Accessed February 1, 2023. <https://www.canada.ca/en/patented-medicine-prices-review/services/consultations/draft-guidelines/draft-guidelines-2019.html>
12. Patented Medicine Prices Review Board. PMPRB Draft Guidelines Consultation. PMPRB Draft Guidelines Consultation. Published September 17, 2020. Accessed October 7, 2020. <https://www.canada.ca/en/patented-medicine-prices-review/services/consultations/draft-guidelines.html>

13. Patented Medicine Prices Review Board. PMPRB Guidelines. Published October 23, 2020. Accessed March 9, 2021. <https://www.canada.ca/en/patented-medicine-prices-review/services/legislation/about-guidelines/guidelines.html>
14. Patented Medicine Prices Review Board. Decision resulting from the consultation on the definition of Gap medicines and the timeline for compliance. Published March 17, 2021. Accessed February 1, 2023. <https://www.canada.ca/en/patented-medicine-prices-review/services/consultations/notice-comment-definition-gap/decision-definition-gap-medicines.html>
15. Innovative Medicines Canada v. Canada (Attorney General) - Federal Court. Accessed October 7, 2020. <https://decisions.fct-cf.gc.ca/fc-cf/decisions/en/item/481803/index.do>
16. Government of Canada. Regulations amending the Regulations Amending the Patented Medicines Regulations (Additional Factors and Information Reporting Requirements), No. 3: SOR/2021-162. *Canada Gazette Part II*. 2021;155(14). Accessed July 22, 2022. <https://canadagazette.gc.ca/rp-pr/p2/2021/2021-07-07/html/sor-dors162-eng.html>
17. Government of Canada. Regulations Amending the Regulations Amending the Patented Medicines Regulations (Additional Factors and Information Reporting Requirements), No. 4: SOR/2021-273. *Canada Gazette, Part II*. 2022;156(1). Accessed January 31, 2023. <https://www.gazette.gc.ca/rp-pr/p2/2022/2022-01-05/html/sor-dors273-eng.html>
18. Government of Canada. Regulations Amending the Regulations Amending the Patented Medicines Regulations (Additional Factors and Information Reporting Requirements), No. 5: SOR/2022-162. *Canada Gazette, Part II*. 2022;156(14). Accessed January 31, 2023. <https://canadagazette.gc.ca/rp-pr/p2/2022/2022-07-06/html/sor-dors162-eng.html>
19. Patented Medicine Prices Review Board. Notice and Comment - PMPRB Price Review Approach During the Interim Period following publication of Amendments to the Patented Medicines Regulations. Published June 30, 2022. Accessed July 22, 2022. <https://www.canada.ca/en/patented-medicine-prices-review/services/consultations/notice-comment-price-review-approach.html>
20. Patented Medicine Prices Review Board. 2022 Proposed updates to the PMPRB Guidelines. Published September 29, 2022. Accessed October 6, 2022. <https://www.canada.ca/en/patented-medicine-prices-review/services/consultations/2022-proposed-updates-guidelines.html>
